# Supplementary material for: Oral Antiviral Defense: Saliva- and Beverage-Like Hypotonicity Dynamically Regulate Formation of Membraneless Biomolecular Condensates of Antiviral Human MxA in Oral Epithelial Cells
Source: Preprints.org preprint supplement (doi:10.20944/preprints202403.0727.v1), 2024-03-12
Supplement: Supplementary file 1 [file supplementary]

Supplementary Materials


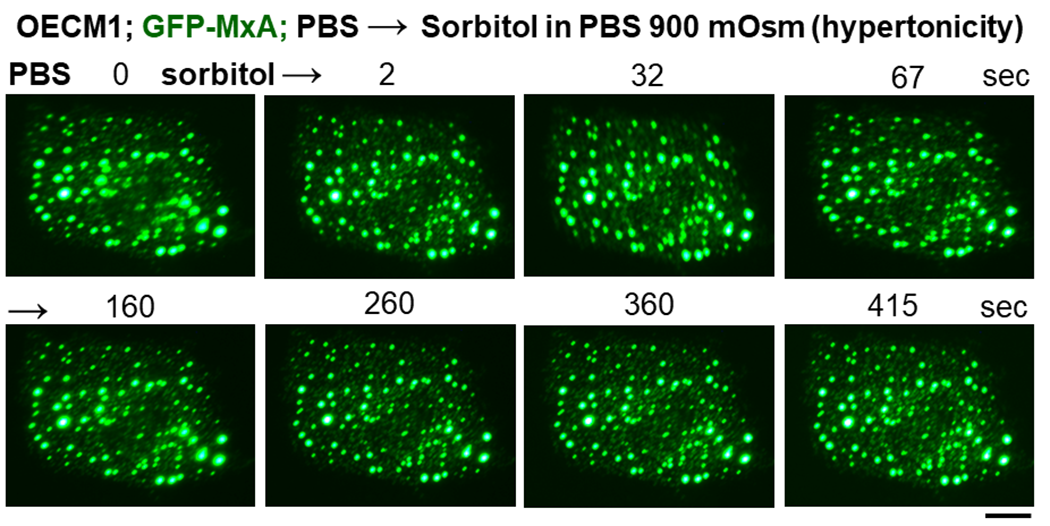


**Figure S1.** Lack of effect of hypertonicity (3x isotonicity) on GFP-MxA condensates in oral epithelial cells. A cell in an OECM1 culture expressing GFP-MxA condensates was first imaged in full culture medium and then shifted to culture medium supplemented with D-sorbitol (net tonicity: 900 mOsm). Live-cell imaging was carried out as indicated. Scale bar = 10 µm.


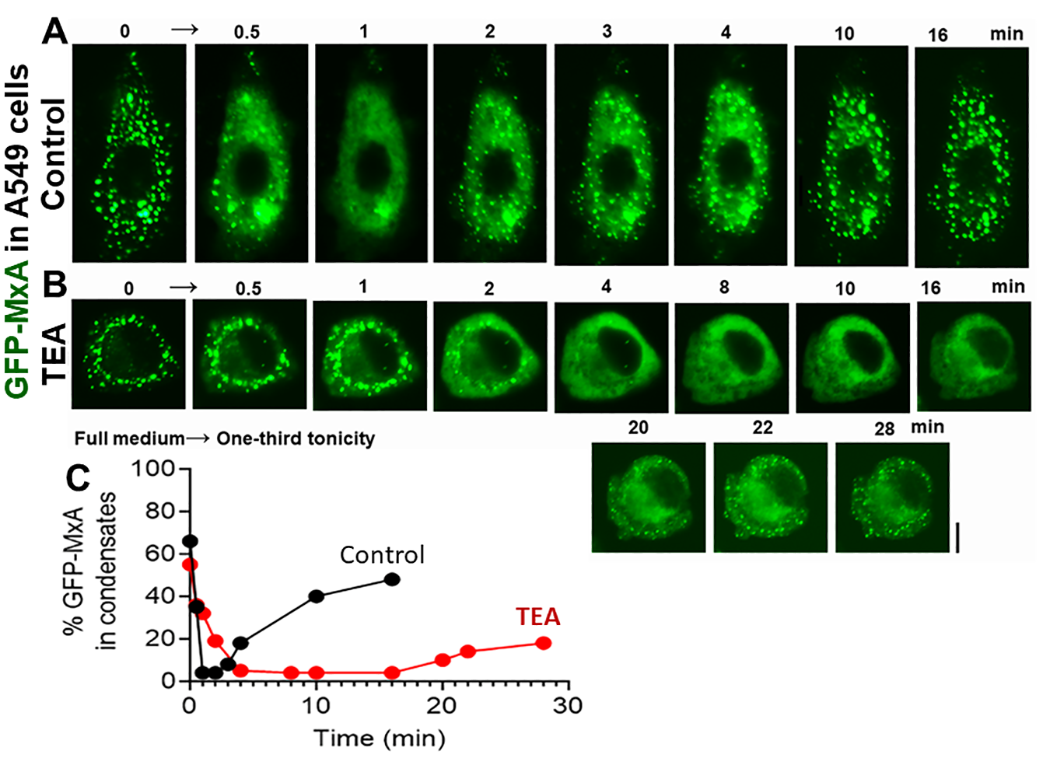


**Figure S2.** Testing a biochemical basis for hypotonicity sensing by GFP-MxA condensates in oral epithelial cells. Panels A and B, A549 cells were either kept in full culture medium or exposed to TEA (20 mM) in full culture medium for 20 min. Cultures were then shifted to one-third tonicity medium in the continued presence of TEA. Live-cell imaging was carried out as indicated. Scale bar = 10 µm. Panel C, Quantitation of % GFP-MxA per cell in condensates (in the same cells shown in Panels A and B).
